# Supplementary material
Source: PubMed Central journal article supplement (PMC4860536)
Supplement: PulmCirc-006-S5.s001.pdf [file PulmCirc-006-S5.s001.pdf]

**Appendix from Frey et al., “Assessment of the effects of hepatic impairment and smoking on the pharmacokinetics of a single oral dose of the soluble guanylate cyclase stimulator riociguat (BAY 63-2521)”  
(Pulm. Circ., vol. 6, no. S1, p. S5)**

**Supplemental table**

Table S1. Pharmacokinetic parameters for riociguat and metabolite M1 in nonsmoking healthy individuals (controls) and patients with mild (Child-Pugh A) or moderate (Child-Pugh B) hepatic impairment, following a single oral dose of riociguat 1.0 mg

| Parameter                                                  | Child-Pugh A ( <i>n</i> = 13) | Child-Pugh B ( <i>n</i> = 11) | Control A ( <i>n</i> = 14) | Control B ( <i>n</i> = 14) |
|------------------------------------------------------------|-------------------------------|-------------------------------|----------------------------|----------------------------|
| <b>Riociguat</b>                                           |                               |                               |                            |                            |
| AUC, $\mu\text{g}\cdot\text{h}/\text{L}$                   | 453 (60)                      | 552 (56)                      | 344 (70)                   | 369 (64)                   |
| AUC <sub>norm</sub> , $\text{kg}\cdot\text{h}/\text{L}$    | 38.1 (59)                     | 44.2 (59)                     | 28.1 (69)                  | 29.3 (67)                  |
| $C_{\text{max}}$ , $\mu\text{g}/\text{L}$                  | 43.5 (36)                     | 43.1 (44)                     | 42.8 (24)                  | 40.2 (30)                  |
| $C_{\text{max, norm}}$ , $\text{kg}/\text{L}$              | 3.66 (36)                     | 3.45 (29)                     | 3.50 (19)                  | 3.18 (22)                  |
| $t_{\text{max}}$ , hours                                   | 1.00 (0.500–3.00)             | 1.50 (0.750–4.00)             | 0.750 (0.500–3.00)         | 1.50 (0.500–3.00)          |
| $t_{1/2}$ , hours                                          | 10.9 (36)                     | 15.2 (47)                     | 8.9 (63)                   | 9.2 (58)                   |
| CL/F, L/h                                                  | 2.21 (60)                     | 1.81 (56)                     | 2.90 (70)                  | 2.71 (64)                  |
| $f_{\text{u}}$ , %                                         | 3.34 (14)                     | 4.28 (36)                     | 3.35 (18)                  | 3.43 (24)                  |
| AUC <sub>u, norm</sub> , $\text{kg}\cdot\text{h}/\text{L}$ | 1.27 (53)                     | 1.89 (75)                     | 0.941 (69)                 | 1.00 (69)                  |
| $C_{\text{max, u, norm}}$ , $\text{kg}/\text{L}$           | 0.122 (33)                    | 0.148 (26)                    | 0.117 (24)                 | 0.109 (25)                 |
| $A_{\text{E, ur}}$ , %                                     | 10.7 $\pm$ 4.48               | 14.0 $\pm$ 9.51               | 11.0 $\pm$ 5.29            | 10.7 $\pm$ 4.15            |
| CL <sub>R</sub> , L/h                                      | 0.217 (60)                    | 0.221 (110)                   | 0.281 (32)                 | 0.267 (44)                 |
| <b>Metabolite M1</b>                                       |                               |                               |                            |                            |
| AUC, $\mu\text{g}\cdot\text{h}/\text{L}$                   | 267 (51)                      | 226 (55)                      | 219 (40)                   | 221 (37)                   |
| AUC <sub>norm</sub> , $\text{kg}\cdot\text{h}/\text{L}$    | 23.2 (46)                     | 18.7 (62)                     | 18.5 (37)                  | 18.1 (33)                  |
| $C_{\text{max}}$ , $\mu\text{g}/\text{L}$                  | 6.83 (56)                     | 4.98 (70)                     | 7.06 (74)                  | 6.98 (69)                  |
| $C_{\text{max, norm}}$ , $\text{kg}/\text{L}$              | 0.594 (53)                    | 0.412 (59)                    | 0.597 (70)                 | 0.572 (60)                 |
| $t_{\text{max}}$ , hours                                   | 12.0 (2.00–48.0)              | 12.0 (4.00–48.0)              | 8.00 (2.00–24.0)           | 12.0 (4.00–24.0)           |
| $t_{1/2}$ , hours                                          | 20.0 (30)                     | 23.0 (54)                     | 15.2 (30)                  | 16.5 (33)                  |
| CL/F, L/h                                                  | 3.62 (51)                     | 4.28 (55)                     | 4.41 (41)                  | 4.37 (37)                  |
| $f_{\text{u}}$ , %                                         | 2.70 (14)                     | 3.80 (37)                     | 2.91 (17)                  | 2.98 (20)                  |
| AUC <sub>u, norm</sub> , $\text{kg}\cdot\text{h}/\text{L}$ | 0.627 (47)                    | 0.715 (61)                    | 0.541 (49)                 | 0.541 (40)                 |
| $C_{\text{max, u, norm}}$ , $\text{kg}/\text{L}$           | 0.0161 (51)                   | 0.0157 (38)                   | 0.0174 (76)                | 0.0171 (63)                |
| $A_{\text{E, ur}}$ , %                                     | 12.2 $\pm$ 7.50               | 5.72 $\pm$ 4.49 <sup>a</sup>  | 15.1 $\pm$ 8.81            | 13.3 $\pm$ 6.75            |
| CL <sub>R</sub> , L/h                                      | 0.391 (93)                    | 0.209 (126) <sup>a</sup>      | 0.594 (48)                 | 0.529 (61)                 |

Note: Data are geometric means (percentage coefficient of variation) except for  $t_{\text{max}}$ , which is expressed as median (range), and  $A_{\text{E, ur}}$ , which is expressed as arithmetic mean  $\pm$  standard deviation.  $A_{\text{E, ur}}$ : amount excreted into urine from time 0 to infinity; AUC: area under the plasma concentration–time curve from time 0 to infinity; AUC<sub>norm</sub>: AUC divided by dose of riociguat per kilogram of body weight for total (bound and unbound) riociguat/M1; AUC<sub>u, norm</sub>: AUC divided by dose of riociguat per kilogram of body weight for unbound riociguat/M1; CL/F: apparent oral clearance for total riociguat/M1; CL<sub>R</sub>: renal clearance of riociguat/M1;  $C_{\text{max}}$ : maximum concentration in plasma;  $C_{\text{max, norm}}$ :  $C_{\text{max}}$  divided by dose of riociguat per kilogram of body weight for total riociguat/M1;  $C_{\text{max, u, norm}}$ :  $C_{\text{max}}$  divided by dose of riociguat per kilogram of body weight for unbound riociguat/M1;  $f_{\text{u}}$ : fraction unbound;  $t_{\text{max}}$ : time to  $C_{\text{max}}$  of total riociguat/M1;  $t_{1/2}$ : terminal elimination half-life for total riociguat/M1.

<sup>a</sup> Data were available from 10 patients.
